## RETRACTION

# Retraction: The prognostic value of prognostic nutritional index in hepatocellular carcinoma patients: A meta-analysis of observational studies

The *PLOS ONE* Editors

After this article was published, similarities were noted between this article and submissions by other research groups, which call into question the validity and provenance of the reported results. In light of these issues, the *PLOS ONE* Editors retract this article [1].

PW did not agree with retraction. ZW and JW either did not respond or could not be reached directly to comment on the retraction decision.

## Reference

1. Wang Z, Wang J, Wang P (2018) The prognostic value of prognostic nutritional index in hepatocellular carcinoma patients: A meta-analysis of observational studies. *PLoS ONE* 13(10): e0202987. <https://doi.org/10.1371/journal.pone.0202987> PMID: 30312295

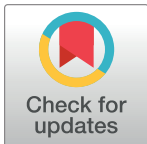

## OPEN ACCESS

**Citation:** The *PLOS ONE* Editors (2022) Retraction: The prognostic value of prognostic nutritional index in hepatocellular carcinoma patients: A meta-analysis of observational studies. *PLoS ONE* 17(8): e0273618. <https://doi.org/10.1371/journal.pone.0273618>

**Published:** August 22, 2022

**Copyright:** © 2022 The PLOS ONE Editors. This is an open access article distributed under the terms of the [Creative Commons Attribution License](https://creativecommons.org/licenses/by/4.0/), which permits unrestricted use, distribution, and reproduction in any medium, provided the original author and source are credited.
